# Supplementary material for: Halogenation of A-frame μ-carbido complexes: a diamagnetic rhodium(ii) carbido complex
Source: Royal Society of Chemistry journal article supplement (doi:10.1039/d0cc02349c), 2020-01-01

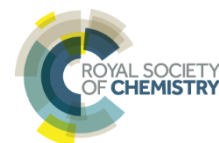

## Chemical Communications

### ELECTRONIC SUPPORTING INFORMATION

#### $^1\text{H}$ NMR Spectrum of $[\text{Rh}_2(\mu\text{-C})\text{Cl}_2(\text{dppf})_2]$ (4)

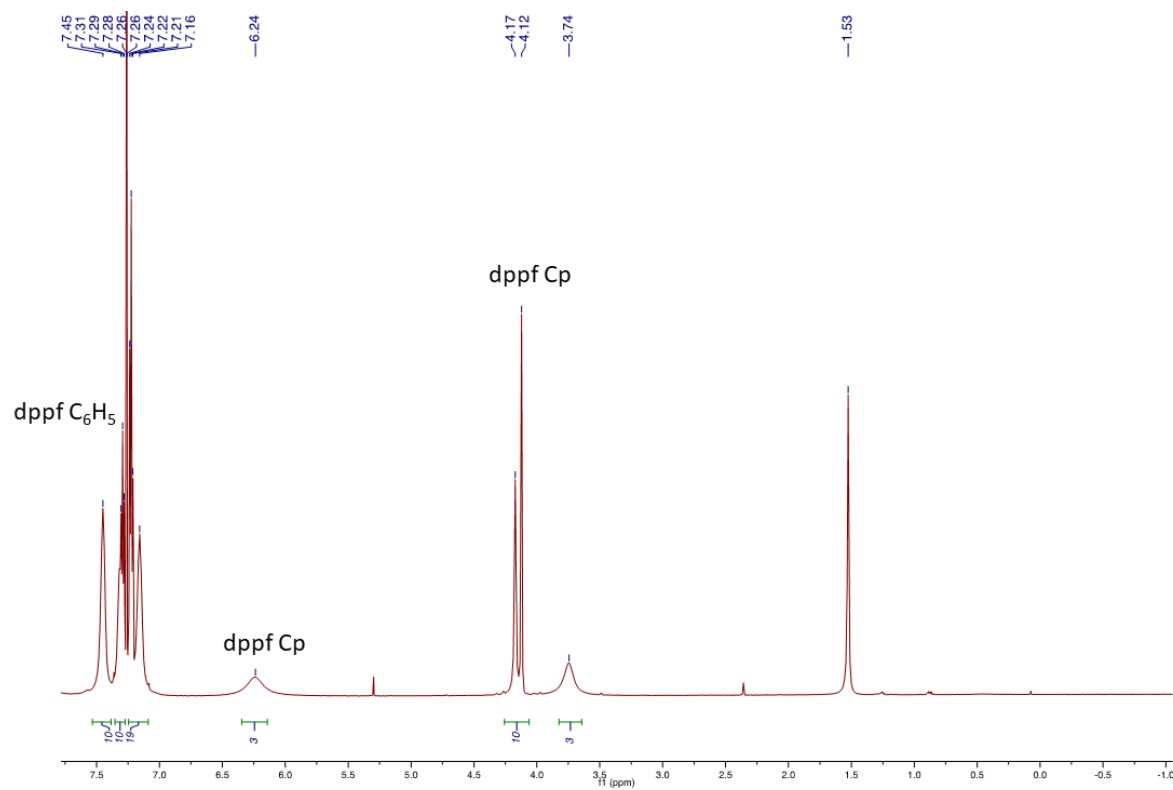

**$^{31}\text{P}\{^1\text{H}\}$  NMR Spectrum of  $[\text{Rh}_2(\mu\text{-C})\text{Cl}_2(\text{dppf})_2]$  (4)**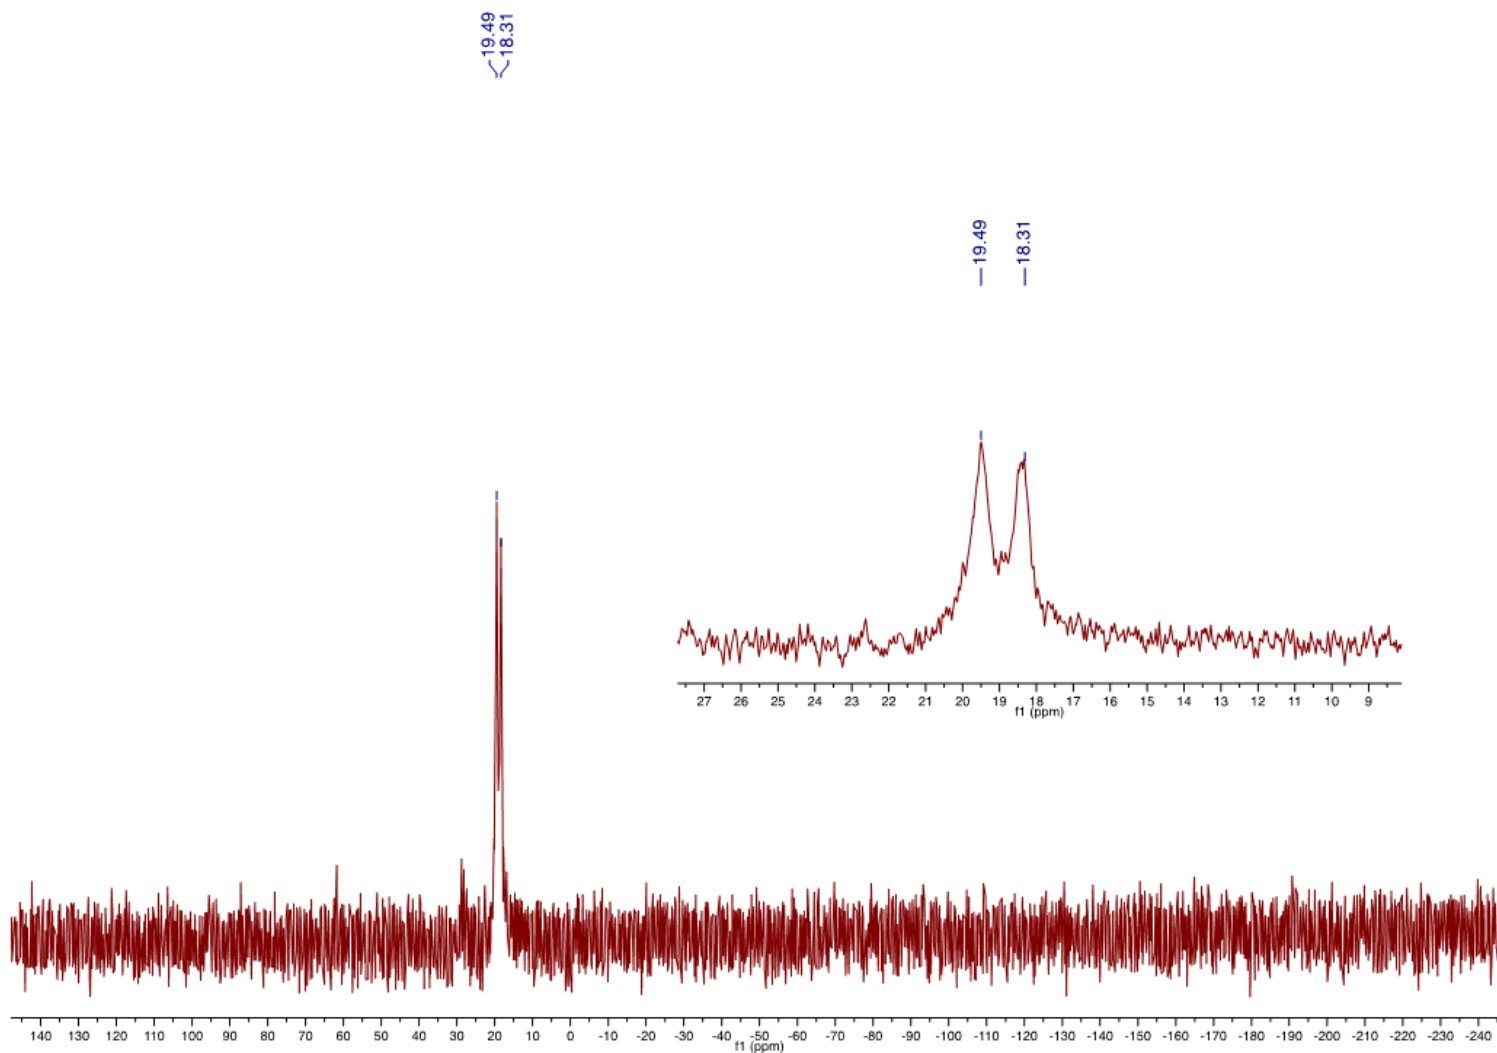

$^{13}\text{C}\{^1\text{H}\}$  NMR Spectrum of  $[\text{Rh}_2(\mu\text{-C})\text{Cl}_2(\text{dppf})_2]$  (4)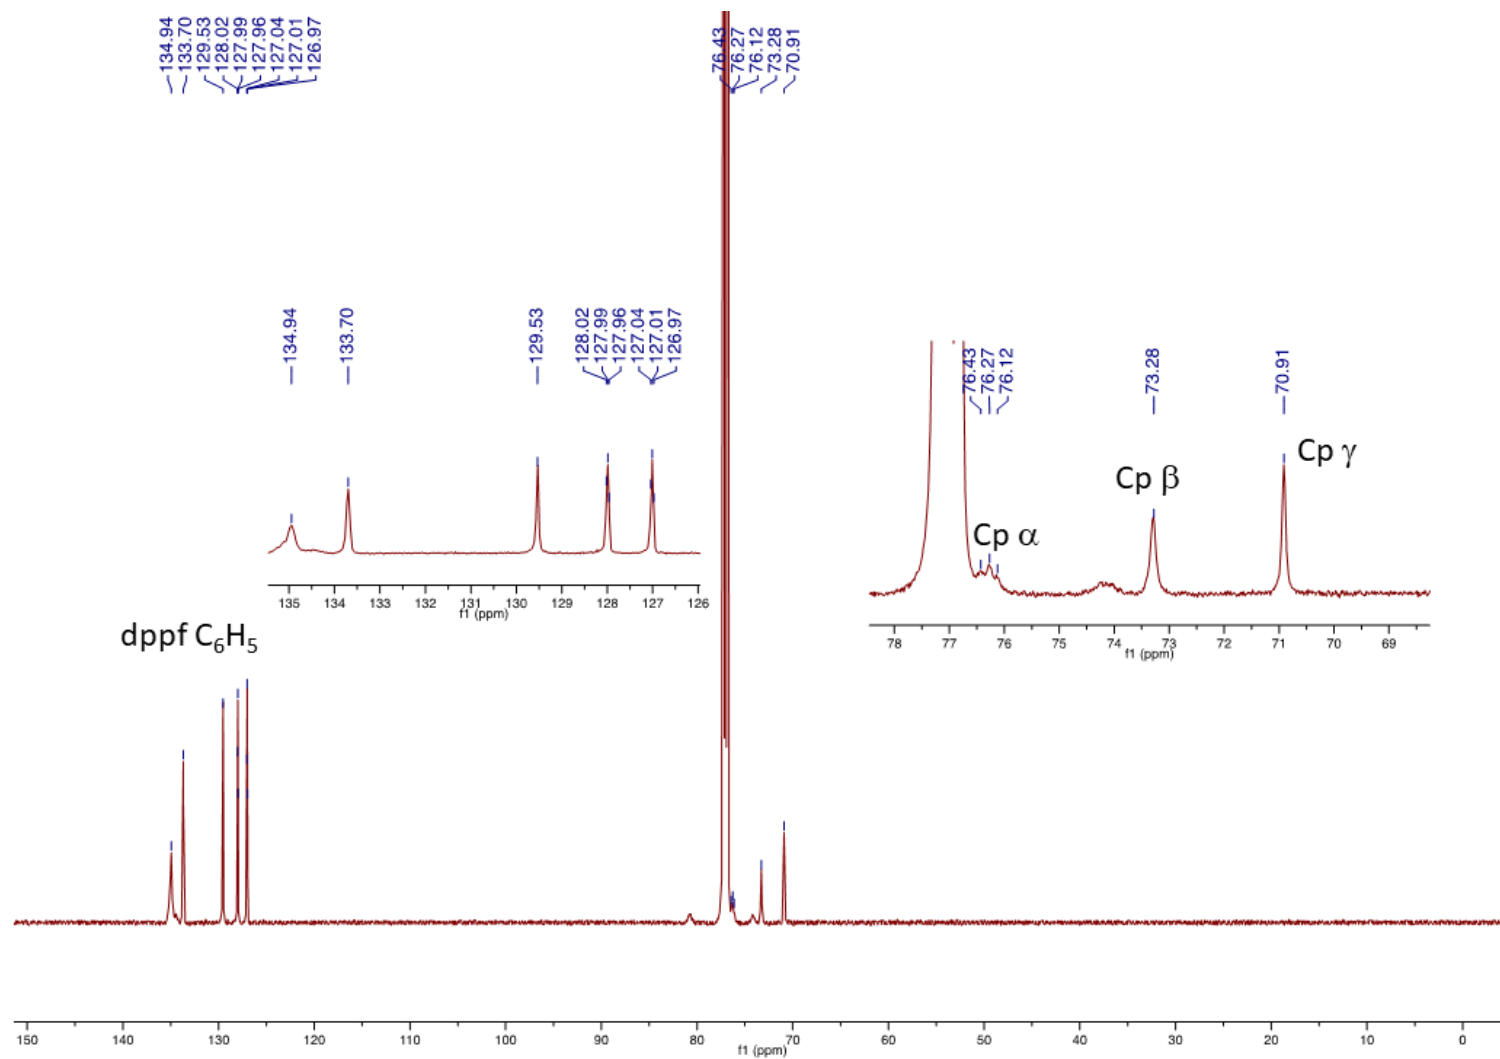

$^1\text{H}$  NMR Spectrum of  $[\text{Rh}_2(\mu\text{-C})\text{Cl}_4(\mu\text{-dppf})_2]$  (5)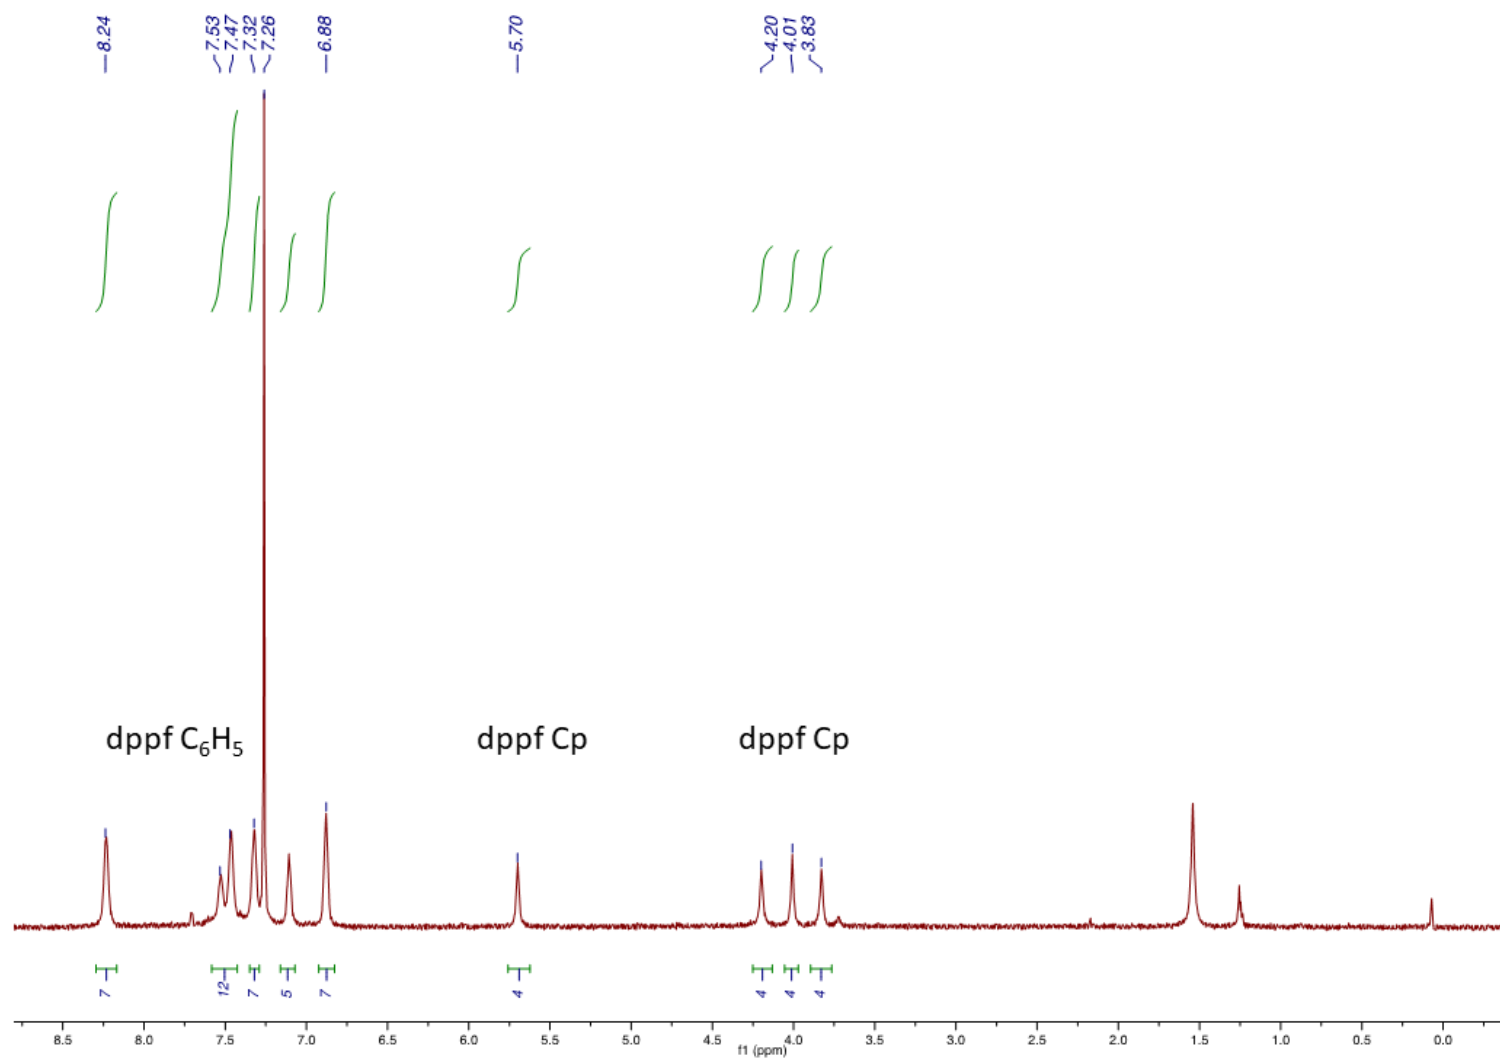

**$^{31}\text{P}\{^1\text{H}\}$  NMR Spectrum of  $[\text{Rh}_2(\mu\text{-C})\text{Cl}_4(\mu\text{-dppf})_2]$  (5)**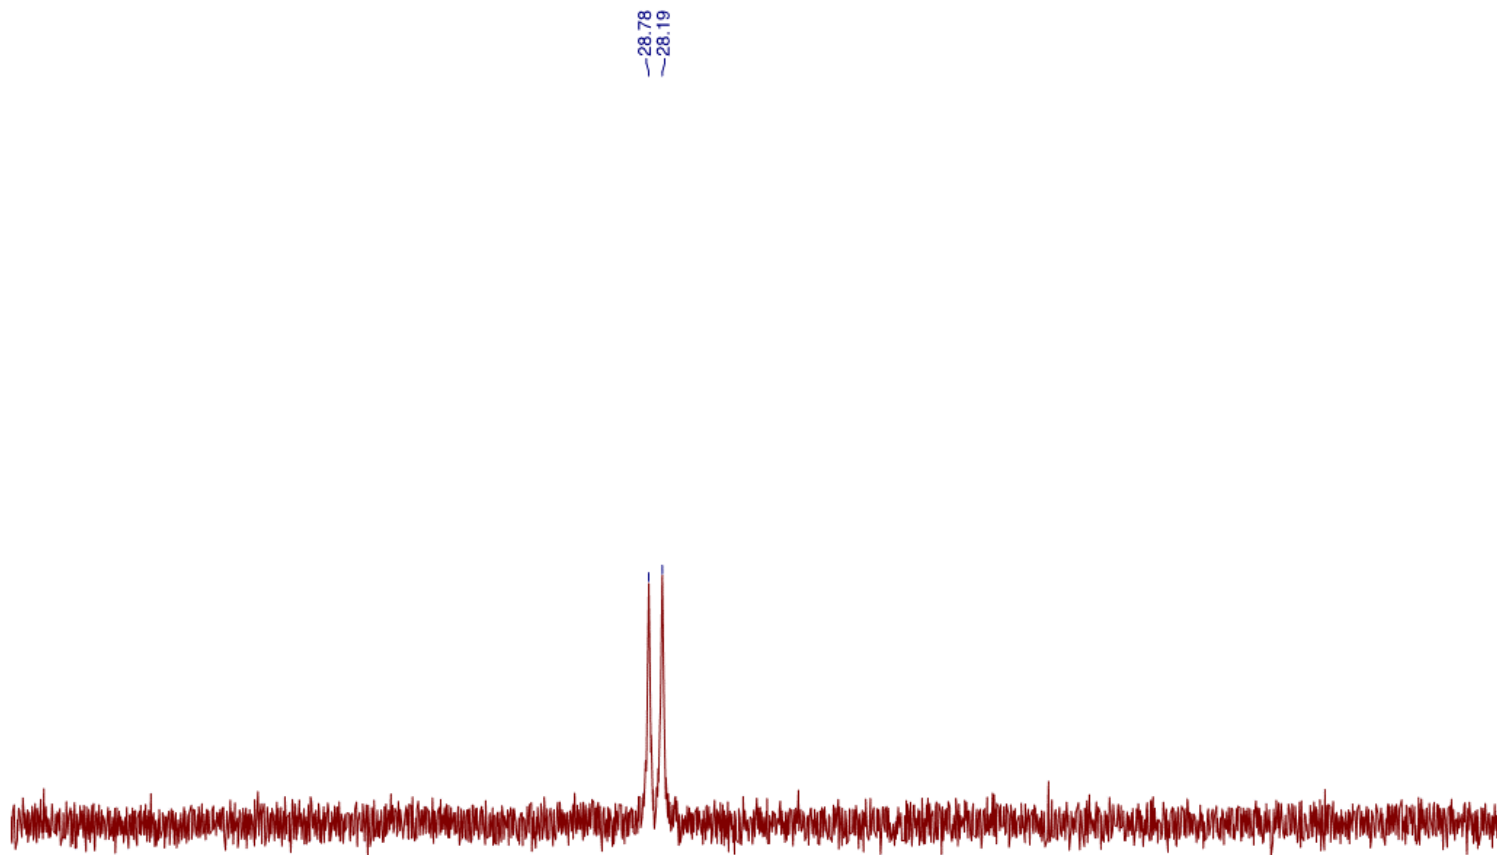

<sup>13</sup>C NMR Spectrum of [Rh<sub>2</sub>(μ-C)Cl<sub>4</sub>(μ-dppf)<sub>2</sub>] (5)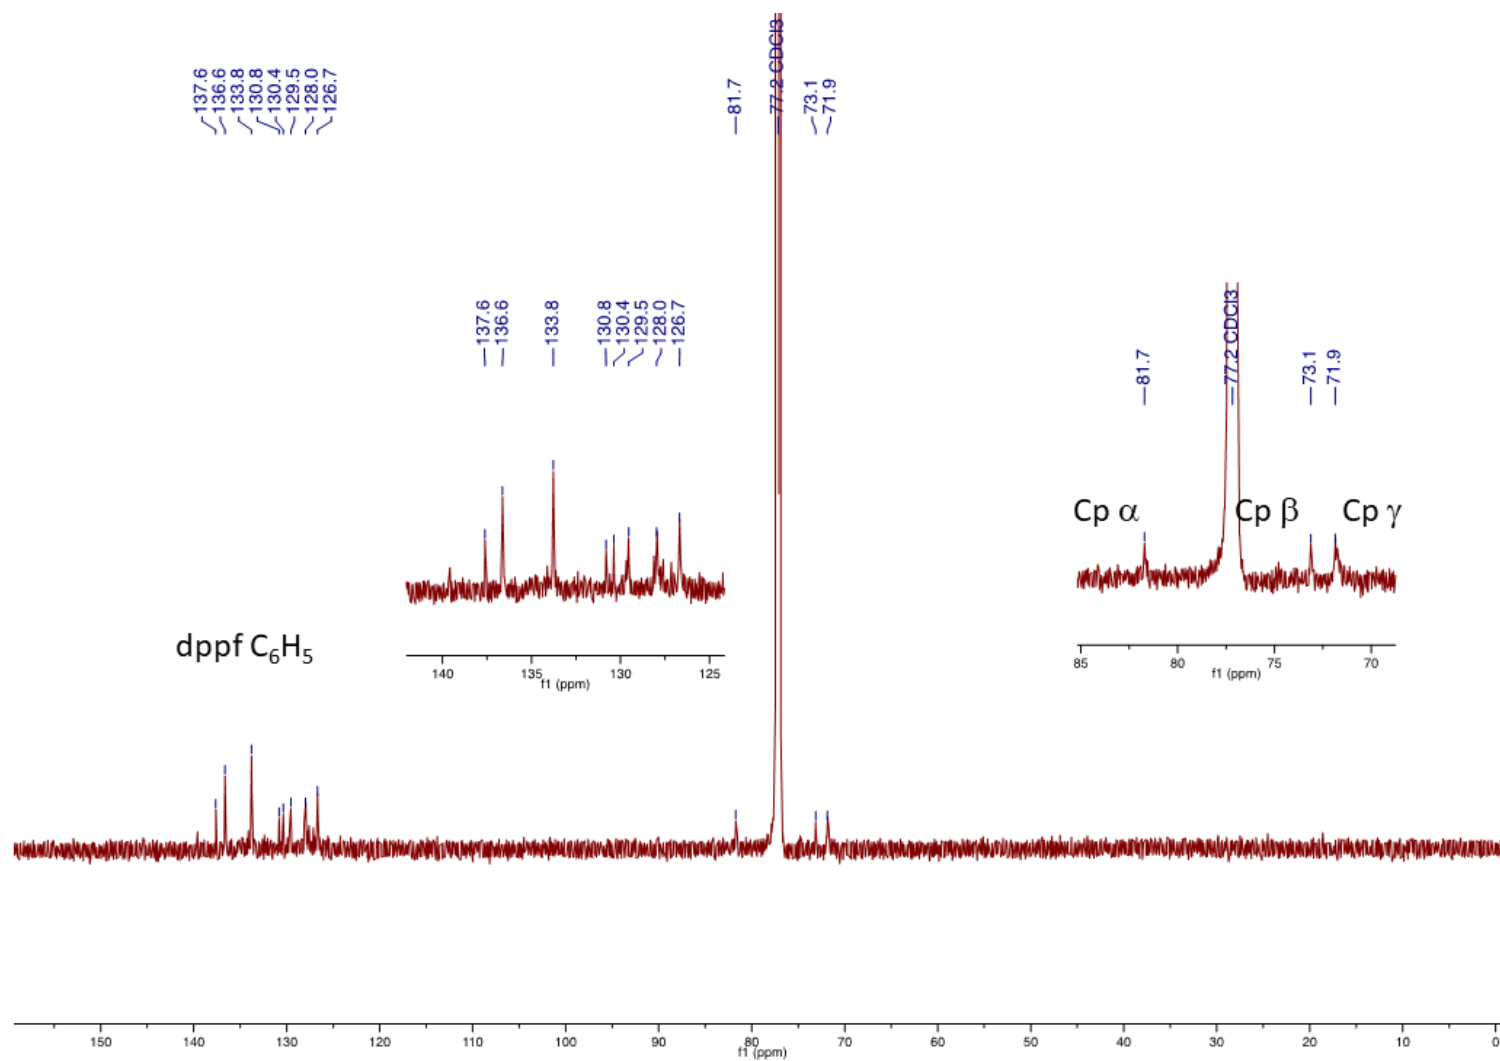

Supplement: d0cc02349c2.pdf [file d0cc02349c2.pdf]
